# Supplementary material
Source: MDPI journal article supplement (https://www.mdpi.com/2073-4352/2/3/1253)
Supplement: s1 [file s1]

 
data_pr33z 
 
_audit_creation_method            SHELXL-97 
_chemical_name_systematic 
; 
 ? 
; 
_chemical_name_common             ? 
_chemical_melting_point           ? 
_chemical_formula_moiety      'C28 H21 N4 O20 Pr2, C5 H6 N O, 8(H2 O)'
_chemical_formula_sum         'C33 H43 N5 O29 Pr2' 
_chemical_formula_weight          1255.54 
 
loop_ 
 _atom_type_symbol 
 _atom_type_description 
 _atom_type_scat_dispersion_real 
 _atom_type_scat_dispersion_imag 
 _atom_type_scat_source 
 'C'  'C'   0.0033   0.0016 
 'International Tables Vol C Tables 4.2.6.8 and 6.1.1.4' 
 'H'  'H'   0.0000   0.0000 
 'International Tables Vol C Tables 4.2.6.8 and 6.1.1.4' 
 'O'  'O'   0.0106   0.0060 
 'International Tables Vol C Tables 4.2.6.8 and 6.1.1.4' 
 'Pr'  'Pr'  -0.2180   2.8214 
 'International Tables Vol C Tables 4.2.6.8 and 6.1.1.4' 
 'N'  'N'   0.0061   0.0033 
 'International Tables Vol C Tables 4.2.6.8 and 6.1.1.4' 
 
_symmetry_cell_setting            triclinic
_symmetry_space_group_name_H-M    'P -1' 
 
loop_ 
 _symmetry_equiv_pos_as_xyz 
 'x, y, z' 
 '-x, -y, -z' 
 
_cell_length_a                    13.2567(1) 
_cell_length_b                    13.6304(2) 
_cell_length_c                    13.6409(2) 
_cell_angle_alpha                 89.695(1) 
_cell_angle_beta                  63.049(1) 
_cell_angle_gamma                 86.105(1) 
_cell_volume                      2191.16(5) 
_cell_formula_units_Z             2 
_cell_measurement_temperature     293(2) 
_cell_measurement_reflns_used     ? 
_cell_measurement_theta_min       ? 
_cell_measurement_theta_max       ? 
 
_exptl_crystal_description        needle
_exptl_crystal_colour             green 
_exptl_crystal_size_max           0.40 
_exptl_crystal_size_mid           0.05 
_exptl_crystal_size_min           0.05 
_exptl_crystal_density_meas       ? 
_exptl_crystal_density_diffrn     1.903 
_exptl_crystal_density_method     'not measured' 
_exptl_crystal_F_000              1252 
_exptl_absorpt_coefficient_mu     2.304 
_exptl_absorpt_correction_type    multi-scan 
_exptl_absorpt_correction_T_min   0.4592 
_exptl_absorpt_correction_T_max   0.8935 
_exptl_absorpt_process_details    'SADABS ' 
 
_exptl_special_details 
; 
 ? 
; 
 
_diffrn_ambient_temperature       293(2) 
_diffrn_radiation_wavelength      0.71073 
_diffrn_radiation_type            MoK\a 
_diffrn_radiation_source          'fine-focus sealed tube' 
_diffrn_radiation_monochromator   graphite 
_diffrn_measurement_device_type   'Bruker APEX-II CCD'
_diffrn_measurement_method        'omega scan' 
_diffrn_detector_area_resol_mean  ? 
_diffrn_standards_number          ? 
_diffrn_standards_interval_count  ? 
_diffrn_standards_interval_time   ? 
_diffrn_standards_decay_%         0 
_diffrn_reflns_number             18565 
_diffrn_reflns_av_R_equivalents   0.0207 
_diffrn_reflns_av_sigmaI/netI     0.0340 
_diffrn_reflns_limit_h_min        -17 
_diffrn_reflns_limit_h_max        16 
_diffrn_reflns_limit_k_min        -17 
_diffrn_reflns_limit_k_max        17 
_diffrn_reflns_limit_l_min        -17 
_diffrn_reflns_limit_l_max        17 
_diffrn_reflns_theta_min          5.19 
_diffrn_reflns_theta_max          27.50 
_reflns_number_total              9996 
_reflns_number_gt                 8617 
_reflns_threshold_expression      I>2sigma(I) 
 
_computing_data_collection        ? 
_computing_cell_refinement        ? 
_computing_data_reduction         ? 
_computing_structure_solution     'SHELXS-97 (Sheldrick, 1990)' 
_computing_structure_refinement   'SHELXL-97 (Sheldrick, 1997)' 
_computing_molecular_graphics     ? 
_computing_publication_material   ? 
 
_refine_special_details 
; 
 Refinement of F^2^ against ALL reflections.  The weighted R-factor wR and 
 goodness of fit S are based on F^2^, conventional R-factors R are based 
 on F, with F set to zero for negative F^2^. The threshold expression of 
 F^2^ > 2sigma(F^2^) is used only for calculating R-factors(gt) etc. and is 
 not relevant to the choice of reflections for refinement.  R-factors based 
 on F^2^ are statistically about twice as large as those based on F, and R- 
 factors based on ALL data will be even larger. 
; 
 
_refine_ls_structure_factor_coef  Fsqd  
_refine_ls_matrix_type            full 
_refine_ls_weighting_scheme       calc  
_refine_ls_weighting_details 
 'calc w=1/[\s^2^(Fo^2^)+(0.0392P)^2^+3.8222P] where P=(Fo^2^+2Fc^2^)/3' 
_atom_sites_solution_primary      direct 
_atom_sites_solution_secondary    difmap 
_atom_sites_solution_hydrogens    'difmap and geom' 
_refine_ls_hydrogen_treatment     constr 
_refine_ls_extinction_method      none 
_refine_ls_extinction_coef        ? 
_refine_ls_number_reflns          9996 
_refine_ls_number_parameters      622 
_refine_ls_number_restraints      0 
_refine_ls_R_factor_all           0.0404 
_refine_ls_R_factor_gt            0.0330 
_refine_ls_wR_factor_ref          0.0842 
_refine_ls_wR_factor_gt           0.0803 
_refine_ls_goodness_of_fit_ref    1.093 
_refine_ls_restrained_S_all       1.093 
_refine_ls_shift/su_max           0.002 
_refine_ls_shift/su_mean          0.000 
 
loop_ 
 _atom_site_label 
 _atom_site_type_symbol 
 _atom_site_fract_x 
 _atom_site_fract_y 
 _atom_site_fract_z 
 _atom_site_U_iso_or_equiv 
 _atom_site_adp_type 
 _atom_site_occupancy 
 _atom_site_symmetry_multiplicity 
 _atom_site_calc_flag 
 _atom_site_refinement_flags 
 _atom_site_disorder_assembly 
 _atom_site_disorder_group 
Pr1 Pr 0.510841(14) 0.764838(12) 0.239504(13) 0.01595(6) Uani 1 1 d . . . 
Pr2 Pr 0.025937(14) 0.699581(12) 0.263085(14) 0.01665(6) Uani 1 1 d . . . 
C1 C 0.3331(3) 0.8971(2) 0.1528(3) 0.0185(6) Uani 1 1 d . . . 
C2 C 0.2780(3) 0.9750(3) 0.1257(3) 0.0239(7) Uani 1 1 d . . . 
H2 H 0.2130 0.9656 0.1182 0.029 Uiso 1 1 calc R . . 
C3 C 0.3211(3) 1.0667(3) 0.1101(3) 0.0256(7) Uani 1 1 d . . . 
H3 H 0.2853 1.1200 0.0925 0.031 Uiso 1 1 calc R . . 
C4 C 0.4191(3) 1.0773(3) 0.1213(3) 0.0240(7) Uani 1 1 d . . . 
H4 H 0.4504 1.1379 0.1109 0.029 Uiso 1 1 calc R . . 
C5 C 0.4691(3) 0.9958(2) 0.1483(3) 0.0190(6) Uani 1 1 d . . . 
C6 C 0.2904(3) 0.7956(2) 0.1747(3) 0.0200(7) Uani 1 1 d . . . 
C7 C 0.5774(3) 1.0000(3) 0.1602(3) 0.0211(7) Uani 1 1 d . . . 
C8 C 0.4764(3) 0.8481(3) 0.4933(3) 0.0215(7) Uani 1 1 d . . . 
C9 C 0.4945(3) 0.8645(3) 0.5839(3) 0.0295(8) Uani 1 1 d . . . 
H9 H 0.4391 0.8982 0.6461 0.035 Uiso 1 1 calc R . . 
C10 C 0.5971(3) 0.8297(3) 0.5799(3) 0.0314(8) Uani 1 1 d . . . 
H10 H 0.6105 0.8381 0.6406 0.038 Uiso 1 1 calc R . . 
C11 C 0.6795(3) 0.7822(3) 0.4849(3) 0.0260(7) Uani 1 1 d . . . 
H11 H 0.7493 0.7591 0.4801 0.031 Uiso 1 1 calc R . . 
C12 C 0.6552(3) 0.7701(2) 0.3970(3) 0.0185(6) Uani 1 1 d . . . 
C13 C 0.3663(3) 0.8783(3) 0.4907(3) 0.0237(7) Uani 1 1 d . . . 
C14 C 0.7399(3) 0.7239(2) 0.2869(3) 0.0177(6) Uani 1 1 d . . . 
C15 C 0.6038(3) 0.5584(3) 0.0574(3) 0.0213(7) Uani 1 1 d . . . 
C16 C 0.6223(3) 0.4629(3) 0.0166(3) 0.0276(8) Uani 1 1 d . . . 
H16 H 0.6645 0.4485 -0.0583 0.033 Uiso 1 1 calc R . . 
C17 C 0.5755(3) 0.3883(3) 0.0914(3) 0.0299(8) Uani 1 1 d . . . 
H17 H 0.5856 0.3231 0.0669 0.036 Uiso 1 1 calc R . . 
C18 C 0.5137(3) 0.4132(3) 0.2025(3) 0.0276(8) Uani 1 1 d . . . 
H18 H 0.4811 0.3650 0.2536 0.033 Uiso 1 1 calc R . . 
C19 C 0.5015(3) 0.5105(3) 0.2361(3) 0.0200(7) Uani 1 1 d . . . 
C20 C 0.6438(3) 0.6461(3) -0.0134(3) 0.0236(7) Uani 1 1 d . . . 
C21 C 0.4403(3) 0.5443(3) 0.3567(3) 0.0220(7) Uani 1 1 d . . . 
C22 C 0.0091(3) 0.4488(3) 0.2319(3) 0.0203(7) Uani 1 1 d . . . 
C23 C -0.0092(3) 0.3509(3) 0.2542(3) 0.0262(7) Uani 1 1 d . . . 
H23 H 0.0200 0.3032 0.1978 0.031 Uiso 1 1 calc R . . 
C24 C -0.0723(3) 0.3250(3) 0.3632(3) 0.0280(8) Uani 1 1 d . . . 
H24 H -0.0871 0.2597 0.3806 0.034 Uiso 1 1 calc R . . 
C25 C -0.1128(3) 0.3980(3) 0.4456(3) 0.0244(7) Uani 1 1 d . . . 
H25 H -0.1563 0.3827 0.5188 0.029 Uiso 1 1 calc R . . 
C26 C -0.0871(3) 0.4936(3) 0.4164(3) 0.0205(7) Uani 1 1 d . . . 
C27 C 0.0713(3) 0.4863(3) 0.1161(3) 0.0232(7) Uani 1 1 d . . . 
C28 C -0.1206(3) 0.5785(3) 0.4985(3) 0.0217(7) Uani 1 1 d . . . 
N1 N 0.4267(2) 0.9077(2) 0.1650(2) 0.0179(5) Uani 1 1 d . . . 
N2 N 0.5556(2) 0.8021(2) 0.4014(2) 0.0188(5) Uani 1 1 d . . . 
N3 N 0.5448(2) 0.5825(2) 0.1654(2) 0.0185(5) Uani 1 1 d . . . 
N4 N -0.0280(2) 0.5192(2) 0.3111(2) 0.0194(6) Uani 1 1 d . . . 
O1 O 0.3448(2) 0.73294(18) 0.2048(2) 0.0233(5) Uani 1 1 d . . . 
O2 O 0.2044(2) 0.78075(18) 0.1631(2) 0.0242(5) Uani 1 1 d . . . 
O3 O 0.6123(2) 0.91942(18) 0.1869(2) 0.0248(5) Uani 1 1 d . . . 
O4 O 0.6229(2) 1.07892(18) 0.1438(2) 0.0273(5) Uani 1 1 d . . . 
O5 O 0.3633(2) 0.86409(19) 0.40018(19) 0.0250(5) Uani 1 1 d . . . 
O6 O 0.2852(2) 0.9138(2) 0.5763(2) 0.0324(6) Uani 1 1 d . . . 
O7 O 0.70387(19) 0.71678(17) 0.21525(18) 0.0195(5) Uani 1 1 d . . . 
O8 O 0.83779(19) 0.69860(18) 0.27097(19) 0.0215(5) Uani 1 1 d . . . 
O9 O 0.6195(2) 0.72966(18) 0.02831(19) 0.0241(5) Uani 1 1 d . . . 
O10 O 0.7007(2) 0.6236(2) -0.1170(2) 0.0329(6) Uani 1 1 d . . . 
H10A H 0.7204 0.6739 -0.1518 0.039 Uiso 1 1 calc R . . 
O11 O 0.4253(2) 0.63649(18) 0.37535(19) 0.0241(5) Uani 1 1 d . . . 
O12 O 0.4125(2) 0.4780(2) 0.4245(2) 0.0323(6) Uani 1 1 d . . . 
O13 O 0.0845(2) 0.57818(18) 0.10792(19) 0.0230(5) Uani 1 1 d . . . 
O14 O 0.1025(3) 0.4282(2) 0.0366(2) 0.0360(7) Uani 1 1 d . . . 
O15 O -0.0885(2) 0.66144(17) 0.45910(19) 0.0233(5) Uani 1 1 d . . . 
O16 O -0.1764(2) 0.56258(19) 0.59892(19) 0.0279(6) Uani 1 1 d . . . 
O18 O 0.1864(2) 0.59584(18) 0.2724(2) 0.0249(5) Uani 1 1 d . . . 
H18A H 0.2396 0.6261 0.2655 0.030 Uiso 1 1 d R . . 
H18B H 0.1838 0.5478 0.3084 0.030 Uiso 1 1 d R . . 
O19 O 0.0328(2) 0.7815(2) 0.0968(2) 0.0343(6) Uani 1 1 d . . . 
H19B H -0.0192 0.7765 0.0784 0.041 Uiso 1 1 d R . . 
H19A H 0.0377 0.8441 0.0954 0.041 Uiso 1 1 d R . . 
O20 O -0.0747(3) 0.8669(2) 0.3204(3) 0.0410(7) Uani 1 1 d . . . 
H20A H -0.1063 0.8897 0.2817 0.049 Uiso 1 1 d R . . 
H20B H -0.0488 0.9188 0.3321 0.049 Uiso 1 1 d R . . 
O21 O 0.0724(3) 0.7872(2) 0.4034(2) 0.0387(7) Uani 1 1 d . . . 
H21B H 0.1085 0.8368 0.4016 0.046 Uiso 1 1 d R . . 
H21A H 0.0129 0.7973 0.4638 0.046 Uiso 1 1 d R . . 
C29 C 0.7754(3) 0.4730(3) 0.1908(3) 0.0238(7) Uani 1 1 d . . . 
H29 H 0.7921 0.5363 0.1657 0.029 Uiso 1 1 calc R . . 
C30 C 0.7119(3) 0.4574(3) 0.3032(3) 0.0237(7) Uani 1 1 d . . . 
C31 C 0.6886(3) 0.3621(3) 0.3382(3) 0.0269(8) Uani 1 1 d . . . 
H31 H 0.6461 0.3499 0.4124 0.032 Uiso 1 1 calc R . . 
C32 C 0.7298(4) 0.2850(3) 0.2605(3) 0.0345(9) Uani 1 1 d . . . 
H32 H 0.7158 0.2207 0.2829 0.041 Uiso 1 1 calc R . . 
C33 C 0.7914(4) 0.3038(3) 0.1504(3) 0.0330(9) Uani 1 1 d . . . 
H33 H 0.8184 0.2526 0.0980 0.040 Uiso 1 1 calc R . . 
N5 N 0.8118(3) 0.3968(2) 0.1202(2) 0.0260(6) Uani 1 1 d . . . 
H5 H 0.8505 0.4077 0.0513 0.031 Uiso 1 1 calc R . . 
O17 O 0.6765(2) 0.53648(19) 0.3698(2) 0.0297(6) Uani 1 1 d . . . 
H17A H 0.6395 0.5198 0.4334 0.036 Uiso 1 1 calc R . . 
O22 O 0.1667(3) 0.9567(3) 0.4229(3) 0.0583(9) Uani 1 1 d . . . 
H22A H 0.2264 0.9299 0.4239 0.070 Uiso 1 1 d R . . 
H22B H 0.1259 0.9656 0.4979 0.070 Uiso 1 1 d R . . 
O23 O 0.8812(2) 0.7605(2) 0.0137(2) 0.0318(6) Uani 1 1 d . . . 
H23B H 0.8902 0.7001 -0.0043 0.038 Uiso 1 1 d R . . 
H23A H 0.8210 0.7625 0.0718 0.038 Uiso 1 1 d R . . 
O24 O 0.7834(2) 0.9539(2) 0.2459(2) 0.0317(6) Uani 1 1 d . . . 
H24B H 0.7513 0.9954 0.2972 0.038 Uiso 1 1 d R . . 
H24A H 0.7327 0.9387 0.2318 0.038 Uiso 1 1 d R . . 
O25 O 0.9689(3) 0.9188(2) -0.1098(3) 0.0438(7) Uani 1 1 d . . . 
H25A H 0.9316 0.9663 -0.0687 0.053 Uiso 1 1 d R . . 
H25B H 0.9380 0.8700 -0.0765 0.053 Uiso 1 1 d R . . 
O26 O 0.8534(2) 1.0715(2) 0.0378(2) 0.0309(6) Uani 1 1 d . . . 
H26A H 0.8831 1.0599 0.0789 0.037 Uiso 1 1 d R . . 
H26B H 0.7854 1.0675 0.0757 0.037 Uiso 1 1 d R . . 
O27 O 0.9502(3) 1.0686(3) 0.3259(3) 0.0486(8) Uani 1 1 d . . . 
H27B H 0.8777 1.0818 0.3512 0.058 Uiso 1 1 d R . . 
H27A H 0.9727 1.0772 0.2565 0.058 Uiso 1 1 d R . . 
O28 O 0.8939(3) 0.8606(3) 0.6192(3) 0.0526(8) Uani 1 1 d . . . 
H28B H 0.8595 0.9153 0.6157 0.063 Uiso 1 1 d R . . 
H28A H 0.9165 0.8829 0.6692 0.063 Uiso 1 1 d R . . 
O29 O 0.7463(2) 0.7265(2) 0.7231(2) 0.0346(6) Uani 1 1 d . . . 
H29B H 0.7791 0.6829 0.6739 0.041 Uiso 1 1 d R . . 
H29A H 0.7911 0.7699 0.7050 0.041 Uiso 1 1 d R . . 
 
loop_ 
 _atom_site_aniso_label 
 _atom_site_aniso_U_11 
 _atom_site_aniso_U_22 
 _atom_site_aniso_U_33 
 _atom_site_aniso_U_23 
 _atom_site_aniso_U_13 
 _atom_site_aniso_U_12 
Pr1 0.01271(9) 0.02087(10) 0.01473(9) 0.00309(6) -0.00668(7) -0.00109(6) 
Pr2 0.01410(9) 0.01994(10) 0.01636(10) 0.00396(6) -0.00738(7) -0.00102(6) 
C1 0.0153(15) 0.0217(16) 0.0186(15) 0.0030(12) -0.0074(13) -0.0029(12) 
C2 0.0227(17) 0.0282(18) 0.0241(17) 0.0060(14) -0.0136(15) -0.0026(14) 
C3 0.0280(19) 0.0250(18) 0.0259(18) 0.0060(14) -0.0143(15) 0.0003(14) 
C4 0.0258(18) 0.0213(17) 0.0247(17) 0.0030(13) -0.0113(15) -0.0027(13) 
C5 0.0186(16) 0.0223(16) 0.0152(15) 0.0030(12) -0.0066(13) -0.0036(12) 
C6 0.0169(16) 0.0247(17) 0.0179(16) 0.0046(12) -0.0074(13) -0.0032(13) 
C7 0.0178(16) 0.0274(18) 0.0164(15) -0.0002(13) -0.0061(13) -0.0037(13) 
C8 0.0166(16) 0.0258(17) 0.0186(16) 0.0015(13) -0.0053(13) 0.0004(13) 
C9 0.0228(18) 0.040(2) 0.0217(17) -0.0054(15) -0.0073(15) 0.0038(15) 
C10 0.0270(19) 0.049(2) 0.0214(18) -0.0006(16) -0.0141(16) 0.0000(17) 
C11 0.0212(17) 0.037(2) 0.0214(17) 0.0022(14) -0.0114(14) 0.0004(14) 
C12 0.0144(15) 0.0219(16) 0.0177(15) 0.0048(12) -0.0060(13) -0.0015(12) 
C13 0.0184(17) 0.0246(17) 0.0240(17) 0.0010(13) -0.0065(14) 0.0011(13) 
C14 0.0130(15) 0.0199(16) 0.0187(15) 0.0064(12) -0.0058(12) -0.0033(12) 
C15 0.0198(17) 0.0271(18) 0.0195(16) 0.0012(13) -0.0113(14) -0.0006(13) 
C16 0.0271(19) 0.033(2) 0.0231(18) -0.0015(14) -0.0116(15) -0.0013(15) 
C17 0.034(2) 0.0251(19) 0.0301(19) 0.0000(15) -0.0140(17) -0.0055(15) 
C18 0.030(2) 0.0289(19) 0.0255(18) 0.0057(14) -0.0136(16) -0.0070(15) 
C19 0.0179(16) 0.0248(17) 0.0187(16) 0.0027(13) -0.0096(13) -0.0025(13) 
C20 0.0192(17) 0.035(2) 0.0195(16) 0.0047(14) -0.0108(14) -0.0028(14) 
C21 0.0207(17) 0.0274(18) 0.0185(16) 0.0043(13) -0.0091(14) -0.0044(13) 
C22 0.0176(16) 0.0260(17) 0.0174(16) 0.0049(13) -0.0078(13) -0.0034(13) 
C23 0.0296(19) 0.0267(18) 0.0223(17) 0.0012(14) -0.0115(15) -0.0029(14) 
C24 0.034(2) 0.0239(18) 0.0246(18) 0.0082(14) -0.0119(16) -0.0059(15) 
C25 0.0251(18) 0.0278(18) 0.0167(16) 0.0060(13) -0.0066(14) 0.0000(14) 
C26 0.0166(16) 0.0255(17) 0.0191(16) 0.0047(13) -0.0083(13) 0.0010(13) 
C27 0.0229(17) 0.0273(18) 0.0208(17) 0.0049(13) -0.0109(14) -0.0049(14) 
C28 0.0183(16) 0.0264(18) 0.0181(16) 0.0052(13) -0.0068(13) 0.0015(13) 
N1 0.0150(13) 0.0227(14) 0.0152(13) 0.0038(10) -0.0057(11) -0.0039(10) 
N2 0.0147(13) 0.0240(14) 0.0165(13) 0.0022(10) -0.0060(11) -0.0015(10) 
N3 0.0155(13) 0.0258(15) 0.0153(13) 0.0043(10) -0.0079(11) -0.0017(11) 
N4 0.0159(13) 0.0247(15) 0.0174(13) 0.0037(11) -0.0076(11) -0.0002(11) 
O1 0.0191(12) 0.0241(12) 0.0323(13) 0.0104(10) -0.0161(11) -0.0059(9) 
O2 0.0198(12) 0.0284(13) 0.0317(13) 0.0113(10) -0.0173(11) -0.0083(10) 
O3 0.0221(13) 0.0269(13) 0.0314(13) 0.0070(10) -0.0169(11) -0.0057(10) 
O4 0.0246(13) 0.0262(13) 0.0311(14) 0.0018(10) -0.0116(11) -0.0090(10) 
O5 0.0180(12) 0.0349(14) 0.0204(12) -0.0021(10) -0.0083(10) 0.0059(10) 
O6 0.0200(13) 0.0455(16) 0.0255(13) -0.0085(11) -0.0062(11) 0.0078(11) 
O7 0.0140(11) 0.0267(13) 0.0166(11) 0.0018(9) -0.0062(9) 0.0014(9) 
O8 0.0139(11) 0.0271(13) 0.0247(12) 0.0055(10) -0.0098(10) -0.0011(9) 
O9 0.0244(13) 0.0273(13) 0.0187(12) 0.0045(10) -0.0081(10) -0.0024(10) 
O10 0.0408(16) 0.0355(15) 0.0143(12) 0.0041(10) -0.0059(11) -0.0005(12) 
O11 0.0262(13) 0.0256(13) 0.0168(11) 0.0046(9) -0.0065(10) -0.0032(10) 
O12 0.0417(16) 0.0305(14) 0.0187(12) 0.0075(10) -0.0077(12) -0.0086(12) 
O13 0.0250(13) 0.0255(13) 0.0176(11) 0.0052(9) -0.0085(10) -0.0050(10) 
O14 0.0537(18) 0.0310(15) 0.0167(12) 0.0009(10) -0.0093(12) -0.0105(13) 
O15 0.0254(13) 0.0235(12) 0.0193(12) 0.0040(9) -0.0091(10) 0.0012(10) 
O16 0.0320(14) 0.0299(14) 0.0146(12) 0.0054(10) -0.0045(11) 0.0005(11) 
O18 0.0212(12) 0.0257(13) 0.0318(13) 0.0135(10) -0.0152(11) -0.0061(10) 
O19 0.0312(15) 0.0413(16) 0.0376(15) 0.0184(12) -0.0206(13) -0.0138(12) 
O20 0.0475(18) 0.0282(15) 0.058(2) -0.0013(13) -0.0343(16) 0.0062(13) 
O21 0.0400(17) 0.0454(17) 0.0299(15) -0.0040(12) -0.0155(13) -0.0006(13) 
C29 0.0214(17) 0.0272(18) 0.0221(17) 0.0075(13) -0.0091(14) -0.0032(13) 
C30 0.0202(17) 0.0291(19) 0.0214(17) 0.0029(14) -0.0093(14) -0.0003(13) 
C31 0.0271(19) 0.0310(19) 0.0176(16) 0.0078(14) -0.0056(14) -0.0024(14) 
C32 0.042(2) 0.028(2) 0.028(2) 0.0081(15) -0.0112(18) -0.0035(17) 
C33 0.042(2) 0.029(2) 0.0226(18) -0.0004(15) -0.0096(17) -0.0004(16) 
N5 0.0247(16) 0.0318(17) 0.0172(14) 0.0060(12) -0.0058(12) -0.0029(12) 
O17 0.0358(15) 0.0276(14) 0.0166(12) 0.0044(10) -0.0039(11) -0.0035(11) 
O22 0.050(2) 0.065(2) 0.069(2) -0.0090(19) -0.0372(19) 0.0130(17) 
O23 0.0291(14) 0.0372(15) 0.0222(13) 0.0013(11) -0.0045(11) -0.0098(11) 
O24 0.0272(14) 0.0367(15) 0.0357(15) -0.0031(12) -0.0189(12) 0.0024(11) 
O25 0.0379(17) 0.0374(17) 0.0449(18) 0.0095(13) -0.0093(14) -0.0016(13) 
O26 0.0265(14) 0.0366(15) 0.0320(14) 0.0101(11) -0.0146(12) -0.0078(11) 
O27 0.0471(19) 0.058(2) 0.0411(18) -0.0012(15) -0.0199(16) -0.0090(16) 
O28 0.049(2) 0.050(2) 0.057(2) -0.0077(16) -0.0220(17) -0.0014(15) 
O29 0.0371(16) 0.0374(16) 0.0208(13) 0.0021(11) -0.0067(12) 0.0037(12) 
 
_geom_special_details 
; 
 All esds (except the esd in the dihedral angle between two l.s. planes) 
 are estimated using the full covariance matrix.  The cell esds are taken 
 into account individually in the estimation of esds in distances, angles 
 and torsion angles; correlations between esds in cell parameters are only 
 used when they are defined by crystal symmetry.  An approximate (isotropic) 
 treatment of cell esds is used for estimating esds involving l.s. planes. 
; 
 
loop_ 
 _geom_bond_atom_site_label_1 
 _geom_bond_atom_site_label_2 
 _geom_bond_distance 
 _geom_bond_site_symmetry_2 
 _geom_bond_publ_flag 

Pr1 O7 2.469(2) . y 
Pr1 O11 2.472(2) . y 
Pr1 O5 2.499(2) . y 
Pr1 O3 2.501(2) . y 
Pr1 O1 2.518(2) . y 
Pr1 N2 2.594(3) . y 
Pr1 O9 2.601(2) . y 
Pr1 N1 2.604(3) . y 
Pr1 N3 2.620(3) . y 

Pr2 O8 2.448(2) 1_455 y
Pr2 O2 2.469(2) . y 
Pr2 O15 2.477(2) . y 
Pr2 O13 2.489(2) . y 
Pr2 O19 2.490(3) . y 
Pr2 O20 2.501(3) . y 
Pr2 O18 2.525(2) . y 
Pr2 O21 2.582(3) . y 
Pr2 N4 2.604(3) . y 

C1 N1 1.342(4) . ? 
C1 C2 1.390(5) . ? 
C1 C6 1.507(5) . ? 
C2 C3 1.386(5) . ? 
C2 H2 0.9300 . ? 
C3 C4 1.392(5) . ? 
C3 H3 0.9300 . ? 
C4 C5 1.388(5) . ? 
C4 H4 0.9300 . ? 
C5 N1 1.335(4) . ? 
C5 C7 1.521(5) . ? 
C6 O2 1.249(4) . ? 
C6 O1 1.264(4) . ? 
C7 O4 1.239(4) . ? 
C7 O3 1.278(4) . ? 
C8 N2 1.339(4) . ? 
C8 C9 1.384(5) . ? 
C8 C13 1.505(5) . ? 
C9 C10 1.387(5) . ? 
C9 H9 0.9300 . ? 
C10 C11 1.386(5) . ? 
C10 H10 0.9300 . ? 
C11 C12 1.390(5) . ? 
C11 H11 0.9300 . ? 
C12 N2 1.336(4) . ? 
C12 C14 1.516(4) . ? 
C13 O6 1.245(4) . ? 
C13 O5 1.269(4) . ? 
C14 O8 1.239(4) . ? 
C14 O7 1.274(4) . ? 
C15 N3 1.348(4) . ? 
C15 C16 1.380(5) . ? 
C15 C20 1.501(5) . ? 
C16 C17 1.399(5) . ? 
C16 H16 0.9300 . ? 
C17 C18 1.387(5) . ? 
C17 H17 0.9300 . ? 
C18 C19 1.381(5) . ? 
C18 H18 0.9300 . ? 
C19 N3 1.336(4) . ? 
C19 C21 1.525(5) . ? 
C20 O9 1.231(4) . ? 
C20 O10 1.291(4) . ? 
C21 O12 1.238(4) . ? 
C21 O11 1.267(4) . ? 
C22 N4 1.341(4) . ? 
C22 C23 1.380(5) . ? 
C22 C27 1.518(5) . ? 
C23 C24 1.393(5) . ? 
C23 H23 0.9300 . ? 
C24 C25 1.391(5) . ? 
C24 H24 0.9300 . ? 
C25 C26 1.380(5) . ? 
C25 H25 0.9300 . ? 
C26 N4 1.345(4) . ? 
C26 C28 1.511(5) . ? 
C27 O14 1.238(4) . ? 
C27 O13 1.274(4) . ? 
C28 O16 1.253(4) . ? 
C28 O15 1.265(4) . ? 
O8 Pr2 2.448(2) 1_655 ? 
O10 H10A 0.8200 . ? 
O18 H18A 0.8095 . ? 
O18 H18B 0.8097 . ? 
O19 H19B 0.8412 . ? 
O19 H19A 0.8590 . ? 
O20 H20A 0.8545 . ? 
O20 H20B 0.8540 . ? 
O21 H21B 0.8477 . ? 
O21 H21A 0.8475 . ? 
C29 N5 1.327(5) . ? 
C29 C30 1.398(5) . ? 
C29 H29 0.9300 . ? 
C30 O17 1.327(4) . ? 
C30 C31 1.388(5) . ? 
C31 C32 1.390(5) . ? 
C31 H31 0.9300 . ? 
C32 C33 1.378(5) . ? 
C32 H32 0.9300 . ? 
C33 N5 1.337(5) . ? 
C33 H33 0.9300 . ? 
N5 H5 0.8600 . ? 
O17 H17A 0.8200 . ? 
O22 H22A 0.8555 . ? 
O22 H22B 0.9195 . ? 
O23 H23B 0.8458 . ? 
O23 H23A 0.8308 . ? 
O24 H24B 0.8322 . ? 
O24 H24A 0.8178 . ? 
O25 H25A 0.8290 . ? 
O25 H25B 0.8256 . ? 
O26 H26A 0.8276 . ? 
O26 H26B 0.8172 . ? 
O27 H27B 0.8669 . ? 
O27 H27A 0.8629 . ? 
O28 H28B 0.8600 . ? 
O28 H28A 0.9193 . ? 
O29 H29B 0.8349 . ? 
O29 H29A 0.8226 . ? 
 
loop_ 
 _geom_angle_atom_site_label_1 
 _geom_angle_atom_site_label_2 
 _geom_angle_atom_site_label_3 
 _geom_angle 
 _geom_angle_site_symmetry_1 
 _geom_angle_site_symmetry_3 
 _geom_angle_publ_flag 
O7 Pr1 O11 92.88(8) . . ? 
O7 Pr1 O5 124.20(8) . . ? 
O11 Pr1 O5 78.19(8) . . ? 
O7 Pr1 O3 75.26(8) . . ? 
O11 Pr1 O3 149.66(8) . . ? 
O5 Pr1 O3 85.56(8) . . ? 
O7 Pr1 O1 150.08(8) . . ? 
O11 Pr1 O1 80.11(8) . . ? 
O5 Pr1 O1 83.08(8) . . ? 
O3 Pr1 O1 123.43(7) . . ? 
O7 Pr1 N2 62.26(8) . . ? 
O11 Pr1 N2 73.98(8) . . ? 
O5 Pr1 N2 62.35(8) . . ? 
O3 Pr1 N2 75.80(8) . . ? 
O1 Pr1 N2 140.03(8) . . ? 
O7 Pr1 O9 78.67(7) . . ? 
O11 Pr1 O9 123.57(8) . . ? 
O5 Pr1 O9 149.96(8) . . ? 
O3 Pr1 O9 82.04(8) . . ? 
O1 Pr1 O9 81.18(8) . . ? 
N2 Pr1 O9 138.68(8) . . ? 
O7 Pr1 N1 133.40(8) . . ? 
O11 Pr1 N1 133.47(8) . . ? 
O5 Pr1 N1 71.77(8) . . ? 
O3 Pr1 N1 61.83(8) . . ? 
O1 Pr1 N1 61.95(8) . . ? 
N2 Pr1 N1 118.72(9) . . ? 
O9 Pr1 N1 78.26(8) . . ? 
O7 Pr1 N3 77.22(8) . . ? 
O11 Pr1 N3 62.54(8) . . ? 
O5 Pr1 N3 136.88(9) . . ? 
O3 Pr1 N3 137.53(8) . . ? 
O1 Pr1 N3 73.73(8) . . ? 
N2 Pr1 N3 117.75(8) . . ? 
O9 Pr1 N3 61.16(8) . . ? 
N1 Pr1 N3 123.47(8) . . ? 
O8 Pr2 O2 139.48(8) 1_455 . ? 
O8 Pr2 O15 79.84(8) 1_455 . ? 
O2 Pr2 O15 133.13(8) . . ? 
O8 Pr2 O13 84.67(8) 1_455 . ? 
O2 Pr2 O13 90.61(8) . . ? 
O15 Pr2 O13 124.09(8) . . ? 
O8 Pr2 O19 71.90(8) 1_455 . ? 
O2 Pr2 O19 68.84(8) . . ? 
O15 Pr2 O19 147.64(8) . . ? 
O13 Pr2 O19 69.28(9) . . ? 
O8 Pr2 O20 70.44(9) 1_455 . ? 
O2 Pr2 O20 87.99(10) . . ? 
O15 Pr2 O20 84.30(9) . . ? 
O13 Pr2 O20 138.64(9) . . ? 
O19 Pr2 O20 71.76(10) . . ? 
O8 Pr2 O18 145.20(8) 1_455 . ? 
O2 Pr2 O18 70.70(8) . . ? 
O15 Pr2 O18 86.43(8) . . ? 
O13 Pr2 O18 76.86(8) . . ? 
O19 Pr2 O18 125.89(9) . . ? 
O20 Pr2 O18 139.98(9) . . ? 
O8 Pr2 O21 125.65(9) 1_455 . ? 
O2 Pr2 O21 70.92(9) . . ? 
O15 Pr2 O21 63.43(9) . . ? 
O13 Pr2 O21 148.93(9) . . ? 
O19 Pr2 O21 122.50(10) . . ? 
O20 Pr2 O21 67.48(10) . . ? 
O18 Pr2 O21 73.55(9) . . ? 
O8 Pr2 N4 76.14(8) 1_455 . ? 
O2 Pr2 N4 135.53(8) . . ? 
O15 Pr2 N4 61.88(8) . . ? 
O13 Pr2 N4 62.29(8) . . ? 
O19 Pr2 N4 123.43(9) . . ? 
O20 Pr2 N4 135.94(10) . . ? 
O18 Pr2 N4 69.19(8) . . ? 
O21 Pr2 N4 114.07(9) . . ? 
N1 C1 C2 122.2(3) . . ? 
N1 C1 C6 114.9(3) . . ? 
C2 C1 C6 122.9(3) . . ? 
C3 C2 C1 119.2(3) . . ? 
C3 C2 H2 120.4 . . ? 
C1 C2 H2 120.4 . . ? 
C2 C3 C4 118.6(3) . . ? 
C2 C3 H3 120.7 . . ? 
C4 C3 H3 120.7 . . ? 
C5 C4 C3 118.7(3) . . ? 
C5 C4 H4 120.7 . . ? 
C3 C4 H4 120.7 . . ? 
N1 C5 C4 122.8(3) . . ? 
N1 C5 C7 114.8(3) . . ? 
C4 C5 C7 122.4(3) . . ? 
O2 C6 O1 125.6(3) . . ? 
O2 C6 C1 117.9(3) . . ? 
O1 C6 C1 116.5(3) . . ? 
O4 C7 O3 126.4(3) . . ? 
O4 C7 C5 118.4(3) . . ? 
O3 C7 C5 115.2(3) . . ? 
N2 C8 C9 122.0(3) . . ? 
N2 C8 C13 114.8(3) . . ? 
C9 C8 C13 123.1(3) . . ? 
C8 C9 C10 118.7(3) . . ? 
C8 C9 H9 120.7 . . ? 
C10 C9 H9 120.7 . . ? 
C11 C10 C9 119.4(3) . . ? 
C11 C10 H10 120.3 . . ? 
C9 C10 H10 120.3 . . ? 
C10 C11 C12 118.3(3) . . ? 
C10 C11 H11 120.9 . . ? 
C12 C11 H11 120.9 . . ? 
N2 C12 C11 122.3(3) . . ? 
N2 C12 C14 114.3(3) . . ? 
C11 C12 C14 123.3(3) . . ? 
O6 C13 O5 124.9(3) . . ? 
O6 C13 C8 118.6(3) . . ? 
O5 C13 C8 116.5(3) . . ? 
O8 C14 O7 124.6(3) . . ? 
O8 C14 C12 119.7(3) . . ? 
O7 C14 C12 115.6(3) . . ? 
N3 C15 C16 123.0(3) . . ? 
N3 C15 C20 113.1(3) . . ? 
C16 C15 C20 123.8(3) . . ? 
C15 C16 C17 118.0(3) . . ? 
C15 C16 H16 121.0 . . ? 
C17 C16 H16 121.0 . . ? 
C18 C17 C16 119.0(3) . . ? 
C18 C17 H17 120.5 . . ? 
C16 C17 H17 120.5 . . ? 
C19 C18 C17 119.0(3) . . ? 
C19 C18 H18 120.5 . . ? 
C17 C18 H18 120.5 . . ? 
N3 C19 C18 122.6(3) . . ? 
N3 C19 C21 114.6(3) . . ? 
C18 C19 C21 122.9(3) . . ? 
O9 C20 O10 126.3(3) . . ? 
O9 C20 C15 120.3(3) . . ? 
O10 C20 C15 113.4(3) . . ? 
O12 C21 O11 128.0(3) . . ? 
O12 C21 C19 115.8(3) . . ? 
O11 C21 C19 116.2(3) . . ? 
N4 C22 C23 122.6(3) . . ? 
N4 C22 C27 114.2(3) . . ? 
C23 C22 C27 123.2(3) . . ? 
C22 C23 C24 118.5(3) . . ? 
C22 C23 H23 120.7 . . ? 
C24 C23 H23 120.7 . . ? 
C25 C24 C23 119.1(3) . . ? 
C25 C24 H24 120.5 . . ? 
C23 C24 H24 120.5 . . ? 
C26 C25 C24 118.6(3) . . ? 
C26 C25 H25 120.7 . . ? 
C24 C25 H25 120.7 . . ? 
N4 C26 C25 122.5(3) . . ? 
N4 C26 C28 113.8(3) . . ? 
C25 C26 C28 123.7(3) . . ? 
O14 C27 O13 124.2(3) . . ? 
O14 C27 C22 119.4(3) . . ? 
O13 C27 C22 116.4(3) . . ? 
O16 C28 O15 124.9(3) . . ? 
O16 C28 C26 118.9(3) . . ? 
O15 C28 C26 116.2(3) . . ? 
C5 N1 C1 118.5(3) . . ? 
C5 N1 Pr1 120.7(2) . . ? 
C1 N1 Pr1 120.5(2) . . ? 
C12 N2 C8 119.3(3) . . ? 
C12 N2 Pr1 120.4(2) . . ? 
C8 N2 Pr1 120.2(2) . . ? 
C19 N3 C15 118.4(3) . . ? 
C19 N3 Pr1 119.5(2) . . ? 
C15 N3 Pr1 122.1(2) . . ? 
C22 N4 C26 118.6(3) . . ? 
C22 N4 Pr2 120.5(2) . . ? 
C26 N4 Pr2 120.7(2) . . ? 
C6 O1 Pr1 125.9(2) . . ? 
C6 O2 Pr2 137.9(2) . . ? 
C7 O3 Pr1 126.6(2) . . ? 
C13 O5 Pr1 125.1(2) . . ? 
C14 O7 Pr1 126.9(2) . . ? 
C14 O8 Pr2 162.3(2) . 1_655 ? 
C20 O9 Pr1 123.2(2) . . ? 
C20 O10 H10A 109.5 . . ? 
C21 O11 Pr1 126.5(2) . . ? 
C27 O13 Pr2 126.2(2) . . ? 
C28 O15 Pr2 127.3(2) . . ? 
Pr2 O18 H18A 114.5 . . ? 
Pr2 O18 H18B 129.2 . . ? 
H18A O18 H18B 108.9 . . ? 
Pr2 O19 H19B 120.9 . . ? 
Pr2 O19 H19A 115.9 . . ? 
H19B O19 H19A 101.3 . . ? 
Pr2 O20 H20A 115.7 . . ? 
Pr2 O20 H20B 127.5 . . ? 
H20A O20 H20B 100.7 . . ? 
Pr2 O21 H21B 134.6 . . ? 
Pr2 O21 H21A 110.0 . . ? 
H21B O21 H21A 101.7 . . ? 
N5 C29 C30 119.5(3) . . ? 
N5 C29 H29 120.2 . . ? 
C30 C29 H29 120.2 . . ? 
O17 C30 C31 124.2(3) . . ? 
O17 C30 C29 116.9(3) . . ? 
C31 C30 C29 118.9(3) . . ? 
C30 C31 C32 119.0(3) . . ? 
C30 C31 H31 120.5 . . ? 
C32 C31 H31 120.5 . . ? 
C33 C32 C31 120.1(4) . . ? 
C33 C32 H32 119.9 . . ? 
C31 C32 H32 119.9 . . ? 
N5 C33 C32 119.0(4) . . ? 
N5 C33 H33 120.5 . . ? 
C32 C33 H33 120.5 . . ? 
C29 N5 C33 123.5(3) . . ? 
C29 N5 H5 118.3 . . ? 
C33 N5 H5 118.3 . . ? 
C30 O17 H17A 109.5 . . ? 
H22A O22 H22B 95.6 . . ? 
H23B O23 H23A 101.4 . . ? 
H24B O24 H24A 103.9 . . ? 
H25A O25 H25B 104.9 . . ? 
H26A O26 H26B 105.9 . . ? 
H27B O27 H27A 100.7 . . ? 
H28B O28 H28A 95.9 . . ? 
H29B O29 H29A 103.9 . . ? 
 
loop_ 
 _geom_torsion_atom_site_label_1 
 _geom_torsion_atom_site_label_2 
 _geom_torsion_atom_site_label_3 
 _geom_torsion_atom_site_label_4 
 _geom_torsion 
 _geom_torsion_site_symmetry_1 
 _geom_torsion_site_symmetry_2 
 _geom_torsion_site_symmetry_3 
 _geom_torsion_site_symmetry_4 
 _geom_torsion_publ_flag 
N1 C1 C2 C3 0.4(5) . . . . ? 
C6 C1 C2 C3 178.1(3) . . . . ? 
C1 C2 C3 C4 0.5(5) . . . . ? 
C2 C3 C4 C5 -0.4(5) . . . . ? 
C3 C4 C5 N1 -0.6(5) . . . . ? 
C3 C4 C5 C7 178.8(3) . . . . ? 
N1 C1 C6 O2 -179.0(3) . . . . ? 
C2 C1 C6 O2 3.1(5) . . . . ? 
N1 C1 C6 O1 1.9(4) . . . . ? 
C2 C1 C6 O1 -176.0(3) . . . . ? 
N1 C5 C7 O4 178.6(3) . . . . ? 
C4 C5 C7 O4 -0.9(5) . . . . ? 
N1 C5 C7 O3 -1.5(4) . . . . ? 
C4 C5 C7 O3 179.0(3) . . . . ? 
N2 C8 C9 C10 -1.8(6) . . . . ? 
C13 C8 C9 C10 176.9(4) . . . . ? 
C8 C9 C10 C11 1.9(6) . . . . ? 
C9 C10 C11 C12 -0.9(6) . . . . ? 
C10 C11 C12 N2 -0.3(5) . . . . ? 
C10 C11 C12 C14 177.0(3) . . . . ? 
N2 C8 C13 O6 173.9(3) . . . . ? 
C9 C8 C13 O6 -4.9(5) . . . . ? 
N2 C8 C13 O5 -5.3(5) . . . . ? 
C9 C8 C13 O5 175.9(3) . . . . ? 
N2 C12 C14 O8 174.5(3) . . . . ? 
C11 C12 C14 O8 -2.9(5) . . . . ? 
N2 C12 C14 O7 -3.6(4) . . . . ? 
C11 C12 C14 O7 179.0(3) . . . . ? 
N3 C15 C16 C17 1.1(5) . . . . ? 
C20 C15 C16 C17 -176.8(3) . . . . ? 
C15 C16 C17 C18 -0.4(5) . . . . ? 
C16 C17 C18 C19 -0.8(6) . . . . ? 
C17 C18 C19 N3 1.5(5) . . . . ? 
C17 C18 C19 C21 -176.9(3) . . . . ? 
N3 C15 C20 O9 -1.6(5) . . . . ? 
C16 C15 C20 O9 176.5(3) . . . . ? 
N3 C15 C20 O10 179.8(3) . . . . ? 
C16 C15 C20 O10 -2.1(5) . . . . ? 
N3 C19 C21 O12 -170.9(3) . . . . ? 
C18 C19 C21 O12 7.7(5) . . . . ? 
N3 C19 C21 O11 8.3(4) . . . . ? 
C18 C19 C21 O11 -173.2(3) . . . . ? 
N4 C22 C23 C24 2.4(5) . . . . ? 
C27 C22 C23 C24 -176.8(3) . . . . ? 
C22 C23 C24 C25 -1.1(5) . . . . ? 
C23 C24 C25 C26 -1.2(5) . . . . ? 
C24 C25 C26 N4 2.5(5) . . . . ? 
C24 C25 C26 C28 -176.6(3) . . . . ? 
N4 C22 C27 O14 -175.3(3) . . . . ? 
C23 C22 C27 O14 4.0(5) . . . . ? 
N4 C22 C27 O13 2.5(4) . . . . ? 
C23 C22 C27 O13 -178.3(3) . . . . ? 
N4 C26 C28 O16 179.7(3) . . . . ? 
C25 C26 C28 O16 -1.2(5) . . . . ? 
N4 C26 C28 O15 -0.8(4) . . . . ? 
C25 C26 C28 O15 178.4(3) . . . . ? 
C4 C5 N1 C1 1.5(5) . . . . ? 
C7 C5 N1 C1 -178.0(3) . . . . ? 
C4 C5 N1 Pr1 -172.2(2) . . . . ? 
C7 C5 N1 Pr1 8.3(4) . . . . ? 
C2 C1 N1 C5 -1.3(5) . . . . ? 
C6 C1 N1 C5 -179.2(3) . . . . ? 
C2 C1 N1 Pr1 172.3(2) . . . . ? 
C6 C1 N1 Pr1 -5.6(4) . . . . ? 
O7 Pr1 N1 C5 -33.5(3) . . . . ? 
O11 Pr1 N1 C5 139.1(2) . . . . ? 
O5 Pr1 N1 C5 86.7(2) . . . . ? 
O3 Pr1 N1 C5 -8.1(2) . . . . ? 
O1 Pr1 N1 C5 178.5(3) . . . . ? 
N2 Pr1 N1 C5 44.2(3) . . . . ? 
O9 Pr1 N1 C5 -95.3(2) . . . . ? 
N3 Pr1 N1 C5 -138.6(2) . . . . ? 
O7 Pr1 N1 C1 152.9(2) . . . . ? 
O11 Pr1 N1 C1 -34.4(3) . . . . ? 
O5 Pr1 N1 C1 -86.8(2) . . . . ? 
O3 Pr1 N1 C1 178.3(3) . . . . ? 
O1 Pr1 N1 C1 5.0(2) . . . . ? 
N2 Pr1 N1 C1 -129.3(2) . . . . ? 
O9 Pr1 N1 C1 91.2(2) . . . . ? 
N3 Pr1 N1 C1 47.9(3) . . . . ? 
C11 C12 N2 C8 0.4(5) . . . . ? 
C14 C12 N2 C8 -177.0(3) . . . . ? 
C11 C12 N2 Pr1 -175.3(3) . . . . ? 
C14 C12 N2 Pr1 7.3(4) . . . . ? 
C9 C8 N2 C12 0.6(5) . . . . ? 
C13 C8 N2 C12 -178.2(3) . . . . ? 
C9 C8 N2 Pr1 176.3(3) . . . . ? 
C13 C8 N2 Pr1 -2.5(4) . . . . ? 
O7 Pr1 N2 C12 -6.0(2) . . . . ? 
O11 Pr1 N2 C12 96.2(2) . . . . ? 
O5 Pr1 N2 C12 -179.0(3) . . . . ? 
O3 Pr1 N2 C12 -86.6(2) . . . . ? 
O1 Pr1 N2 C12 147.8(2) . . . . ? 
O9 Pr1 N2 C12 -26.8(3) . . . . ? 
N1 Pr1 N2 C12 -132.6(2) . . . . ? 
N3 Pr1 N2 C12 50.0(3) . . . . ? 
O7 Pr1 N2 C8 178.4(3) . . . . ? 
O11 Pr1 N2 C8 -79.5(3) . . . . ? 
O5 Pr1 N2 C8 5.3(2) . . . . ? 
O3 Pr1 N2 C8 97.8(3) . . . . ? 
O1 Pr1 N2 C8 -27.9(3) . . . . ? 
O9 Pr1 N2 C8 157.5(2) . . . . ? 
N1 Pr1 N2 C8 51.7(3) . . . . ? 
N3 Pr1 N2 C8 -125.6(2) . . . . ? 
C18 C19 N3 C15 -0.9(5) . . . . ? 
C21 C19 N3 C15 177.7(3) . . . . ? 
C18 C19 N3 Pr1 178.4(3) . . . . ? 
C21 C19 N3 Pr1 -3.1(4) . . . . ? 
C16 C15 N3 C19 -0.5(5) . . . . ? 
C20 C15 N3 C19 177.7(3) . . . . ? 
C16 C15 N3 Pr1 -179.7(3) . . . . ? 
C20 C15 N3 Pr1 -1.6(4) . . . . ? 
O7 Pr1 N3 C19 99.2(2) . . . . ? 
O11 Pr1 N3 C19 -1.0(2) . . . . ? 
O5 Pr1 N3 C19 -27.8(3) . . . . ? 
O3 Pr1 N3 C19 149.8(2) . . . . ? 
O1 Pr1 N3 C19 -88.1(2) . . . . ? 
N2 Pr1 N3 C19 50.4(3) . . . . ? 
O9 Pr1 N3 C19 -176.8(3) . . . . ? 
N1 Pr1 N3 C19 -126.8(2) . . . . ? 
O7 Pr1 N3 C15 -81.6(2) . . . . ? 
O11 Pr1 N3 C15 178.3(3) . . . . ? 
O5 Pr1 N3 C15 151.5(2) . . . . ? 
O3 Pr1 N3 C15 -30.9(3) . . . . ? 
O1 Pr1 N3 C15 91.1(2) . . . . ? 
N2 Pr1 N3 C15 -130.4(2) . . . . ? 
O9 Pr1 N3 C15 2.4(2) . . . . ? 
N1 Pr1 N3 C15 52.4(3) . . . . ? 
C23 C22 N4 C26 -1.2(5) . . . . ? 
C27 C22 N4 C26 178.1(3) . . . . ? 
C23 C22 N4 Pr2 174.4(3) . . . . ? 
C27 C22 N4 Pr2 -6.3(4) . . . . ? 
C25 C26 N4 C22 -1.3(5) . . . . ? 
C28 C26 N4 C22 177.8(3) . . . . ? 
C25 C26 N4 Pr2 -176.9(2) . . . . ? 
C28 C26 N4 Pr2 2.3(4) . . . . ? 
O8 Pr2 N4 C22 96.7(2) 1_455 . . . ? 
O2 Pr2 N4 C22 -53.3(3) . . . . ? 
O15 Pr2 N4 C22 -177.5(3) . . . . ? 
O13 Pr2 N4 C22 5.5(2) . . . . ? 
O19 Pr2 N4 C22 39.8(3) . . . . ? 
O20 Pr2 N4 C22 138.1(2) . . . . ? 
O18 Pr2 N4 C22 -80.2(2) . . . . ? 
O21 Pr2 N4 C22 -140.1(2) . . . . ? 
O8 Pr2 N4 C26 -87.8(2) 1_455 . . . ? 
O2 Pr2 N4 C26 122.2(2) . . . . ? 
O15 Pr2 N4 C26 -2.0(2) . . . . ? 
O13 Pr2 N4 C26 -179.0(3) . . . . ? 
O19 Pr2 N4 C26 -144.6(2) . . . . ? 
O20 Pr2 N4 C26 -46.4(3) . . . . ? 
O18 Pr2 N4 C26 95.3(2) . . . . ? 
O21 Pr2 N4 C26 35.4(3) . . . . ? 
O2 C6 O1 Pr1 -176.0(2) . . . . ? 
C1 C6 O1 Pr1 3.1(4) . . . . ? 
O7 Pr1 O1 C6 -133.6(3) . . . . ? 
O11 Pr1 O1 C6 148.0(3) . . . . ? 
O5 Pr1 O1 C6 68.8(3) . . . . ? 
O3 Pr1 O1 C6 -11.2(3) . . . . ? 
N2 Pr1 O1 C6 98.0(3) . . . . ? 
O9 Pr1 O1 C6 -85.5(3) . . . . ? 
N1 Pr1 O1 C6 -4.2(2) . . . . ? 
N3 Pr1 O1 C6 -147.9(3) . . . . ? 
O1 C6 O2 Pr2 43.8(5) . . . . ? 
C1 C6 O2 Pr2 -135.3(3) . . . . ? 
O8 Pr2 O2 C6 161.3(3) 1_455 . . . ? 
O15 Pr2 O2 C6 24.9(4) . . . . ? 
O13 Pr2 O2 C6 -116.2(3) . . . . ? 
O19 Pr2 O2 C6 176.4(4) . . . . ? 
O20 Pr2 O2 C6 105.2(3) . . . . ? 
O18 Pr2 O2 C6 -40.3(3) . . . . ? 
O21 Pr2 O2 C6 38.3(3) . . . . ? 
N4 Pr2 O2 C6 -67.0(4) . . . . ? 
O4 C7 O3 Pr1 173.1(2) . . . . ? 
C5 C7 O3 Pr1 -6.8(4) . . . . ? 
O7 Pr1 O3 C7 169.1(3) . . . . ? 
O11 Pr1 O3 C7 -121.2(3) . . . . ? 
O5 Pr1 O3 C7 -63.8(3) . . . . ? 
O1 Pr1 O3 C7 14.9(3) . . . . ? 
N2 Pr1 O3 C7 -126.4(3) . . . . ? 
O9 Pr1 O3 C7 88.8(3) . . . . ? 
N1 Pr1 O3 C7 7.9(2) . . . . ? 
N3 Pr1 O3 C7 117.9(3) . . . . ? 
O6 C13 O5 Pr1 -167.8(3) . . . . ? 
C8 C13 O5 Pr1 11.4(4) . . . . ? 
O7 Pr1 O5 C13 -16.5(3) . . . . ? 
O11 Pr1 O5 C13 68.9(3) . . . . ? 
O3 Pr1 O5 C13 -85.4(3) . . . . ? 
O1 Pr1 O5 C13 150.2(3) . . . . ? 
N2 Pr1 O5 C13 -9.1(3) . . . . ? 
O9 Pr1 O5 C13 -151.0(3) . . . . ? 
N1 Pr1 O5 C13 -147.1(3) . . . . ? 
N3 Pr1 O5 C13 93.0(3) . . . . ? 
O8 C14 O7 Pr1 179.9(2) . . . . ? 
C12 C14 O7 Pr1 -2.2(4) . . . . ? 
O11 Pr1 O7 C14 -66.1(3) . . . . ? 
O5 Pr1 O7 C14 11.6(3) . . . . ? 
O3 Pr1 O7 C14 85.6(3) . . . . ? 
O1 Pr1 O7 C14 -141.2(2) . . . . ? 
N2 Pr1 O7 C14 4.2(2) . . . . ? 
O9 Pr1 O7 C14 170.3(3) . . . . ? 
N1 Pr1 O7 C14 108.6(3) . . . . ? 
N3 Pr1 O7 C14 -127.1(3) . . . . ? 
O7 C14 O8 Pr2 129.6(6) . . . 1_655 ? 
C12 C14 O8 Pr2 -48.3(9) . . . 1_655 ? 
O10 C20 O9 Pr1 -177.5(3) . . . . ? 
C15 C20 O9 Pr1 4.1(4) . . . . ? 
O7 Pr1 O9 C20 78.1(3) . . . . ? 
O11 Pr1 O9 C20 -7.8(3) . . . . ? 
O5 Pr1 O9 C20 -138.8(2) . . . . ? 
O3 Pr1 O9 C20 154.6(3) . . . . ? 
O1 Pr1 O9 C20 -79.6(3) . . . . ? 
N2 Pr1 O9 C20 96.9(3) . . . . ? 
N1 Pr1 O9 C20 -142.6(3) . . . . ? 
N3 Pr1 O9 C20 -3.4(2) . . . . ? 
O12 C21 O11 Pr1 168.6(3) . . . . ? 
C19 C21 O11 Pr1 -10.4(4) . . . . ? 
O7 Pr1 O11 C21 -67.5(3) . . . . ? 
O5 Pr1 O11 C21 168.1(3) . . . . ? 
O3 Pr1 O11 C21 -132.8(3) . . . . ? 
O1 Pr1 O11 C21 83.2(3) . . . . ? 
N2 Pr1 O11 C21 -127.6(3) . . . . ? 
O9 Pr1 O11 C21 10.8(3) . . . . ? 
N1 Pr1 O11 C21 117.8(3) . . . . ? 
N3 Pr1 O11 C21 6.5(3) . . . . ? 
O14 C27 O13 Pr2 -179.5(3) . . . . ? 
C22 C27 O13 Pr2 2.9(4) . . . . ? 
O8 Pr2 O13 C27 -81.5(3) 1_455 . . . ? 
O2 Pr2 O13 C27 138.8(3) . . . . ? 
O15 Pr2 O13 C27 -7.6(3) . . . . ? 
O19 Pr2 O13 C27 -154.1(3) . . . . ? 
O20 Pr2 O13 C27 -133.5(3) . . . . ? 
O18 Pr2 O13 C27 68.8(3) . . . . ? 
O21 Pr2 O13 C27 86.8(3) . . . . ? 
N4 Pr2 O13 C27 -4.3(3) . . . . ? 
O16 C28 O15 Pr2 178.3(2) . . . . ? 
C26 C28 O15 Pr2 -1.2(4) . . . . ? 
O8 Pr2 O15 C28 81.3(3) 1_455 . . . ? 
O2 Pr2 O15 C28 -125.8(3) . . . . ? 
O13 Pr2 O15 C28 4.9(3) . . . . ? 
O19 Pr2 O15 C28 110.6(3) . . . . ? 
O20 Pr2 O15 C28 152.4(3) . . . . ? 
O18 Pr2 O15 C28 -66.6(3) . . . . ? 
O21 Pr2 O15 C28 -140.0(3) . . . . ? 
N4 Pr2 O15 C28 1.7(2) . . . . ? 
N5 C29 C30 O17 -179.1(3) . . . . ? 
N5 C29 C30 C31 0.1(5) . . . . ? 
O17 C30 C31 C32 179.6(4) . . . . ? 
C29 C30 C31 C32 0.5(5) . . . . ? 
C30 C31 C32 C33 -0.9(6) . . . . ? 
C31 C32 C33 N5 0.8(6) . . . . ? 
C30 C29 N5 C33 -0.3(5) . . . . ? 
C32 C33 N5 C29 -0.2(6) . . . . ? 
 
loop_ 
 _geom_hbond_atom_site_label_D 
 _geom_hbond_atom_site_label_H 
 _geom_hbond_atom_site_label_A 
 _geom_hbond_distance_DH 
 _geom_hbond_distance_HA 
 _geom_hbond_distance_DA 
 _geom_hbond_angle_DHA 
 _geom_hbond_site_symmetry_A 
O10 H10A O29  0.82 1.74 2.445(4) 143 1_554 
O18 H18A O1   0.81 1.99 2.741(3) 154 . 
O18 H18B O16  0.81 1.94 2.748(3) 177 2_566 
O19 H19B O23  0.84 1.91 2.748(4) 171 1_455 
O19 H19A O26  0.86 2.13 2.742(4) 128 2_675 
O20 H20A O24  0.85 1.90 2.719(4) 160 1_455 
O20 H20B O27  0.85 2.04 2.797(5) 147 1_455 
O21 H21B O22  0.85 1.93 2.770(5) 170 . 
O21 H21A O28  0.85 2.13 2.943(4) 161 1_455 
N5 H5 O13     0.86 1.95 2.804(4) 169 2_665 
O17 H17A O12  0.82 1.74 2.516(3) 158 2_666 
O22 H22A O5   0.86 1.86 2.704(4) 170 . 
O22 H22B O27  0.92 2.21 3.084(5) 160 2_676 
O23 H23B O14  0.85 1.79 2.635(4) 176 2_665 
O23 H23A O7   0.83 2.00 2.785(3) 158 . 
O24 H24B O6   0.83 1.98 2.790(4) 164 2_676 
O24 H24A O3   0.82 1.98 2.796(3) 172 . 
O25 H25A O26  0.83 1.92 2.747(4) 173 . 
O25 H25B O23  0.83 1.90 2.715(4) 170 . 
O26 H26A O25  0.83 2.22 2.944(4) 146 2_775 
O26 H26B O4   0.82 1.92 2.720(4) 168 . 
O27 H27B O6   0.87 1.92 2.775(4) 168 2_676 
O27 H27A O25  0.86 1.79 2.650(5) 173 2_775 
O28 H28B O22  0.86 1.87 2.703(5) 161 2_676 
O28 H28A O27  0.92 1.96 2.728(5) 140 2_776 
O29 H29B O16  0.83 1.85 2.658(4) 162 1_655 
O29 H29A O28  0.82 1.88 2.669(5) 161 . 
 
_diffrn_measured_fraction_theta_max    0.991 
_diffrn_reflns_theta_full              27.50 
_diffrn_measured_fraction_theta_full   0.991 
_refine_diff_density_max    2.324 
_refine_diff_density_min   -1.064 
_refine_diff_density_rms    0.122 
